# Supplementary material for: Lanthanide tri-benzyl complexes: structural variations and useful precursors to phosphorus-stabilised lanthanide carbenes
Source: Royal Society of Chemistry journal article supplement (doi:10.1039/b911717b), 2009-08-27

- *Supplementary Information* -

**Lanthanide Tri-Benzyl Complexes: Structural Variations and Useful Precursors  
to Phosphorus-Stabilised Lanthanide Carbenes**

Ashley Wooles, David P. Mills, William Lewis, Alexander J. Blake and Stephen T.  
Liddle\*

School of Chemistry, University of Nottingham, University Park, Nottingham, NG7  
2RD UK

\*E-mail: [stephen.liddle@nottingham.ac.uk](mailto:stephen.liddle@nottingham.ac.uk)

***GC-MS Data***

GC-MS were recorded on a Thermo Finnigan Trace GC 2000 Polaris Q instrument. An aliquot was removed from the reaction mixture and analysed. MS of the fraction at 3.66 minutes was shown to be predominantly toluene. MS of the fraction at 11.21 minutes showed PhCH<sub>2</sub>CH<sub>2</sub>Ph present as PhCH<sub>2</sub> (*m/z* 91.04) and PhCH<sub>2</sub>CH<sub>2</sub>Ph (*m/z* 182.05). This was compared to an authentic sample of PhCH<sub>2</sub>CH<sub>2</sub>Ph which gave an exact match for retention time, fragmentation pattern and peak masses, confirming the formation of PhCH<sub>2</sub>CH<sub>2</sub>Ph during the synthesis of **9**.

**GC Time Trace**

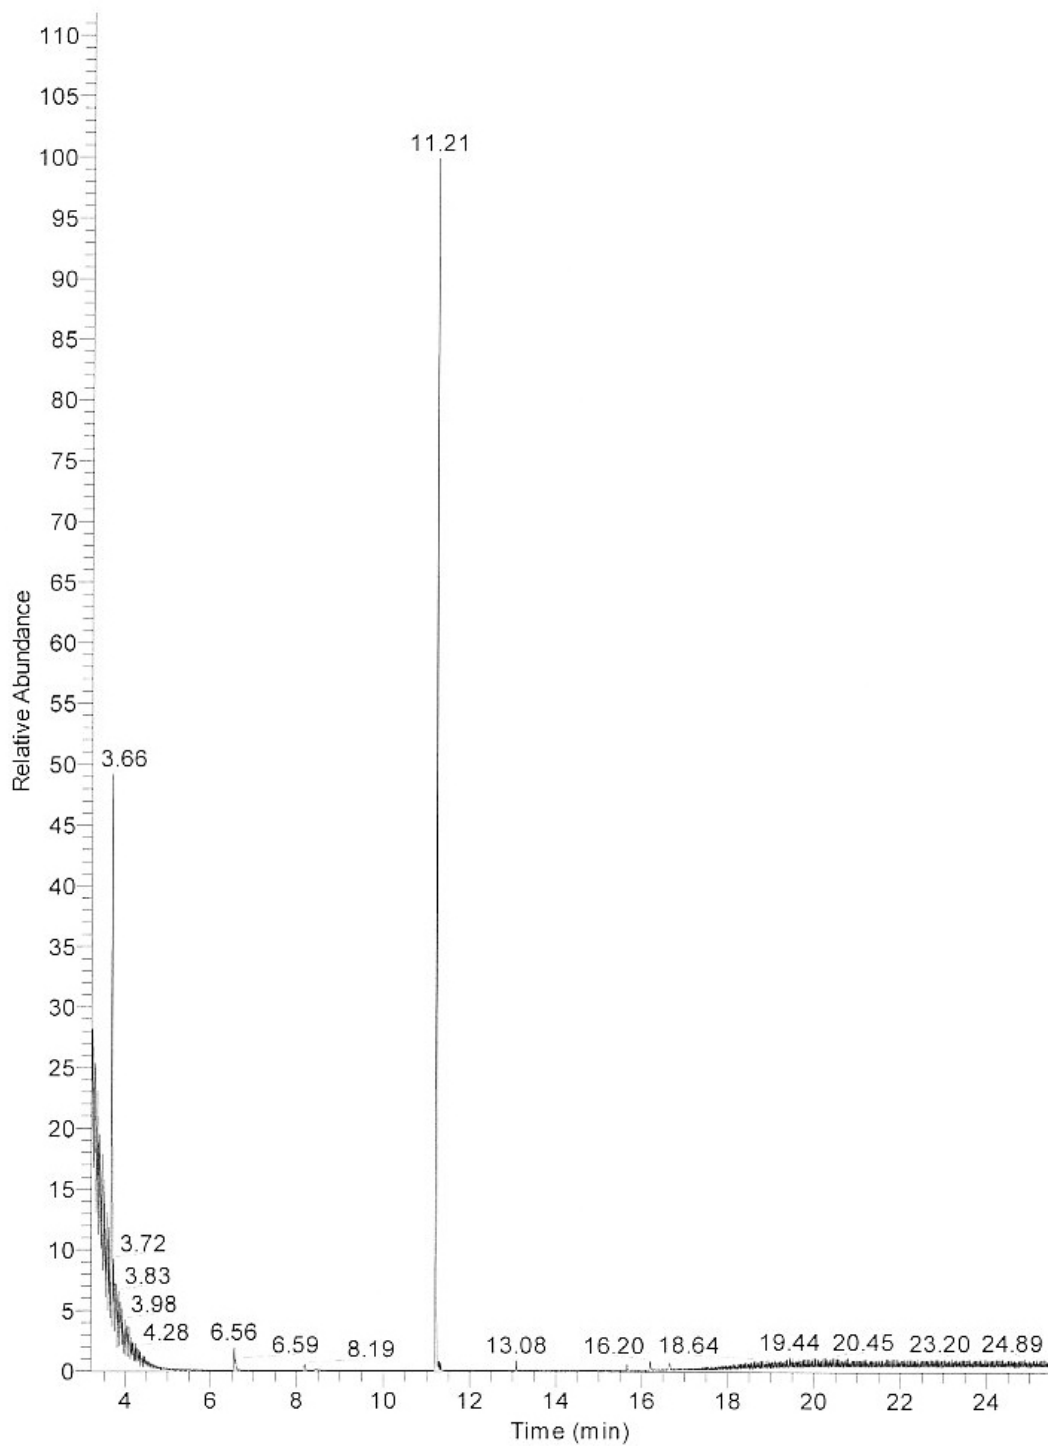

*MS of fraction at t = 11.21 minutes*

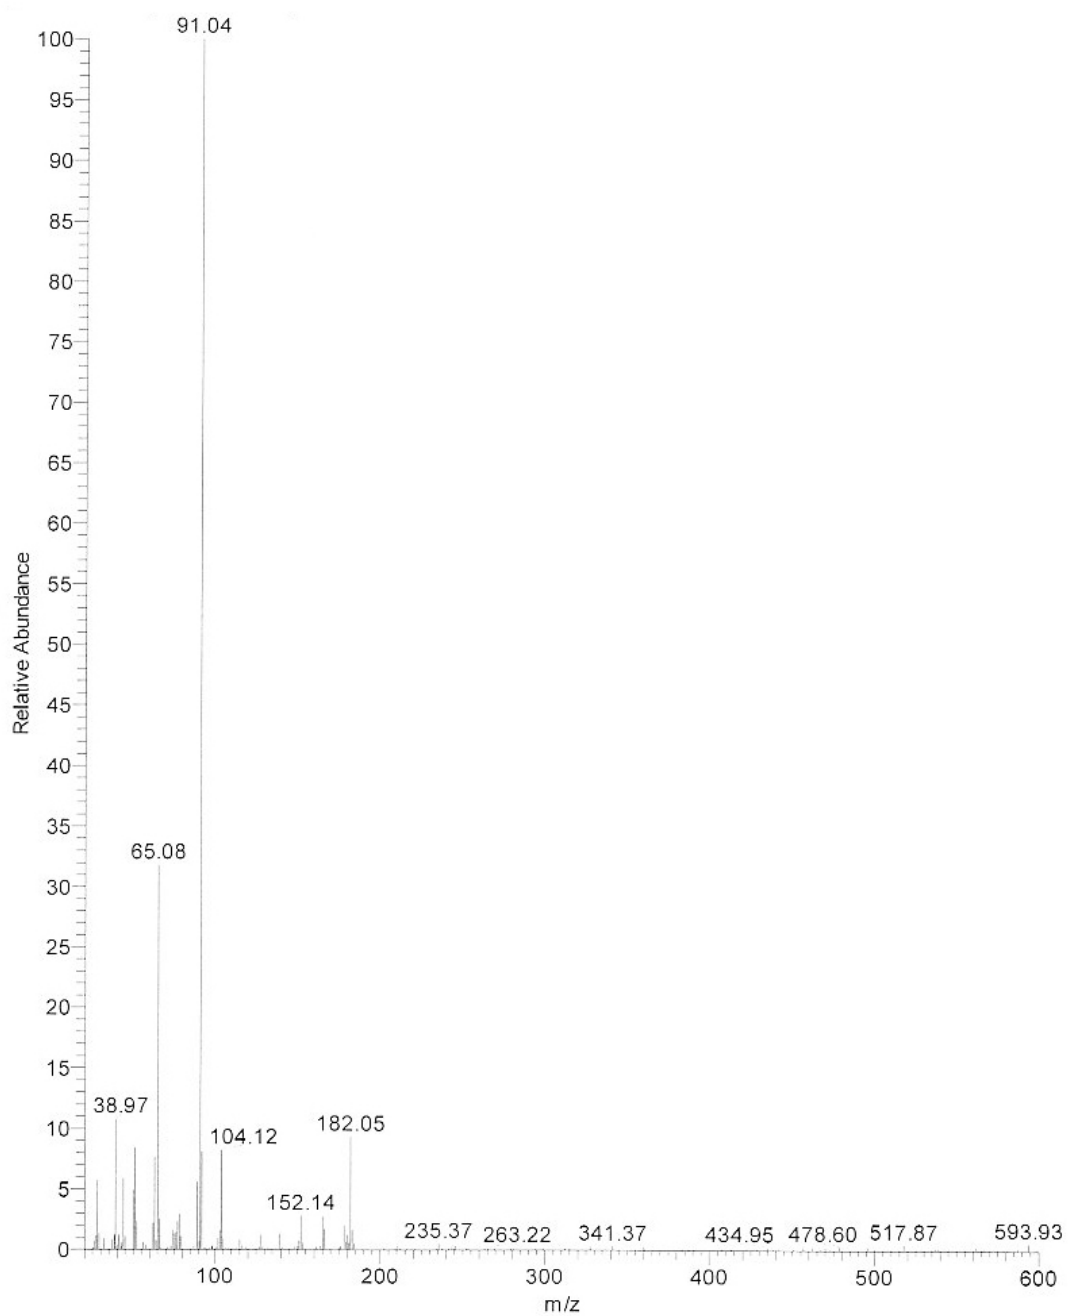

Supplement: b911717b.pdf [file b911717b.pdf]
